# Supplementary material for: Air–liquid interfaces of imidazolium-based [TF2N−] ionic liquids: insight from molecular dynamics simulations
Source: Royal Society of Chemistry journal article supplement (doi:10.1039/c2cp23572b), 2012-01-01

# Air-Liquid Interface of Imidazolium-Based [Tf<sub>2</sub>N<sup>-</sup>] Ionic Liquids: Insight from Molecular Dynamics Simulations

Martin Lísal<sup>1,2</sup>, Zbyšek Posel<sup>2</sup> and Pavel Izák<sup>3</sup>

January 5, 2012

## SUPPLEMENTARY INFORMATION

<sup>1</sup>*E. Hála Laboratory of Thermodynamics, Institute of Chemical Process Fundamentals of the ASCR, v. v. i., 165 02 Prague 6-Suchdol, Czech Republic*

<sup>2</sup>*Department of Physics, Faculty of Science, J. E. Purkinje University, 400 96 Ústí n. Lab., Czech Republic*

<sup>3</sup>*Department of Separation Processes, Institute of Chemical Process Fundamentals of the ASCR, v. v. i., 165 02 Prague 6-Suchdol, Czech Republic*

## Additional Results

**Figure S1:** The surface roughness of  $[\text{C}_6\text{mim}^+][\text{Tf}_2\text{N}^-]$  at a temperature of 300 K. (a, b) Bivariate distribution of the probability (red=high probability, blue=low probability) that two surface points are located at the lateral distance  $l$  and at the normal distance  $d$  from each other for (a) the interfacial and (b) sub-interfacial layers. (c) Average normal distance of two surface points  $\langle d \rangle$  as a function of their lateral distance  $l$ .

**Figure S2:** The surface roughness of  $[\text{C}_8\text{mim}^+][\text{Tf}_2\text{N}^-]$  at a temperature of 300 K. (a, b) Bivariate distribution of the probability (red=high probability, blue=low probability) that two surface points are located at the lateral distance  $l$  and at the normal distance  $d$  from each other for (a) the interfacial and (b) sub-interfacial layers. (c) Average normal distance of two surface points  $\langle d \rangle$  as a function of their lateral distance  $l$ .

**Figure S3:** Orientation of the cation and anion in the interfacial layer for  $[\text{C}_6\text{mim}^+][\text{Tf}_2\text{N}^-]$  at a temperature of 300 K (red=high probability, blue=low probability). (a) Probability distribution  $(\cos \theta, \cos \Phi)$  for the cation ring;  $\theta$  and  $\Phi$  are the tilt angles of the vectors CH and NN, respectively, with respect to the interface normal  $z$ . (b) Two-dimensional plot  $(\cos \theta, z)$  for the cation tail;  $\theta$  is the tilt angle of the vector CN with respect to  $z$ . (c) Probability distribution  $(\cos \theta, \cos \Phi)$  for the anion;  $\theta$  and  $\Phi$  are the tilt angles of the vectors SC and SS, respectively, with respect to  $z$ .

**Figure S4:** Orientation of the cation and anion in the interfacial layer for  $[\text{C}_8\text{mim}^+][\text{Tf}_2\text{N}^-]$  at a temperature of 300 K (red=high probability, blue=low probability). (a) Probability distribution  $(\cos \theta, \cos \Phi)$  for the cation ring;  $\theta$  and  $\Phi$  are the tilt angles of the vectors CH and NN, respectively, with respect to the interface normal  $z$ . (b) Two-dimensional plot  $(\cos \theta, z)$  for the cation tail;  $\theta$  is the tilt angle of the vector CN with respect to  $z$ . (c) Probability distribution  $(\cos \theta, \cos \Phi)$  for the anion;  $\theta$  and  $\Phi$  are the tilt angles of the vectors SC and SS, respectively, with respect to  $z$ .

Fig. S1 (Lisal et al.)

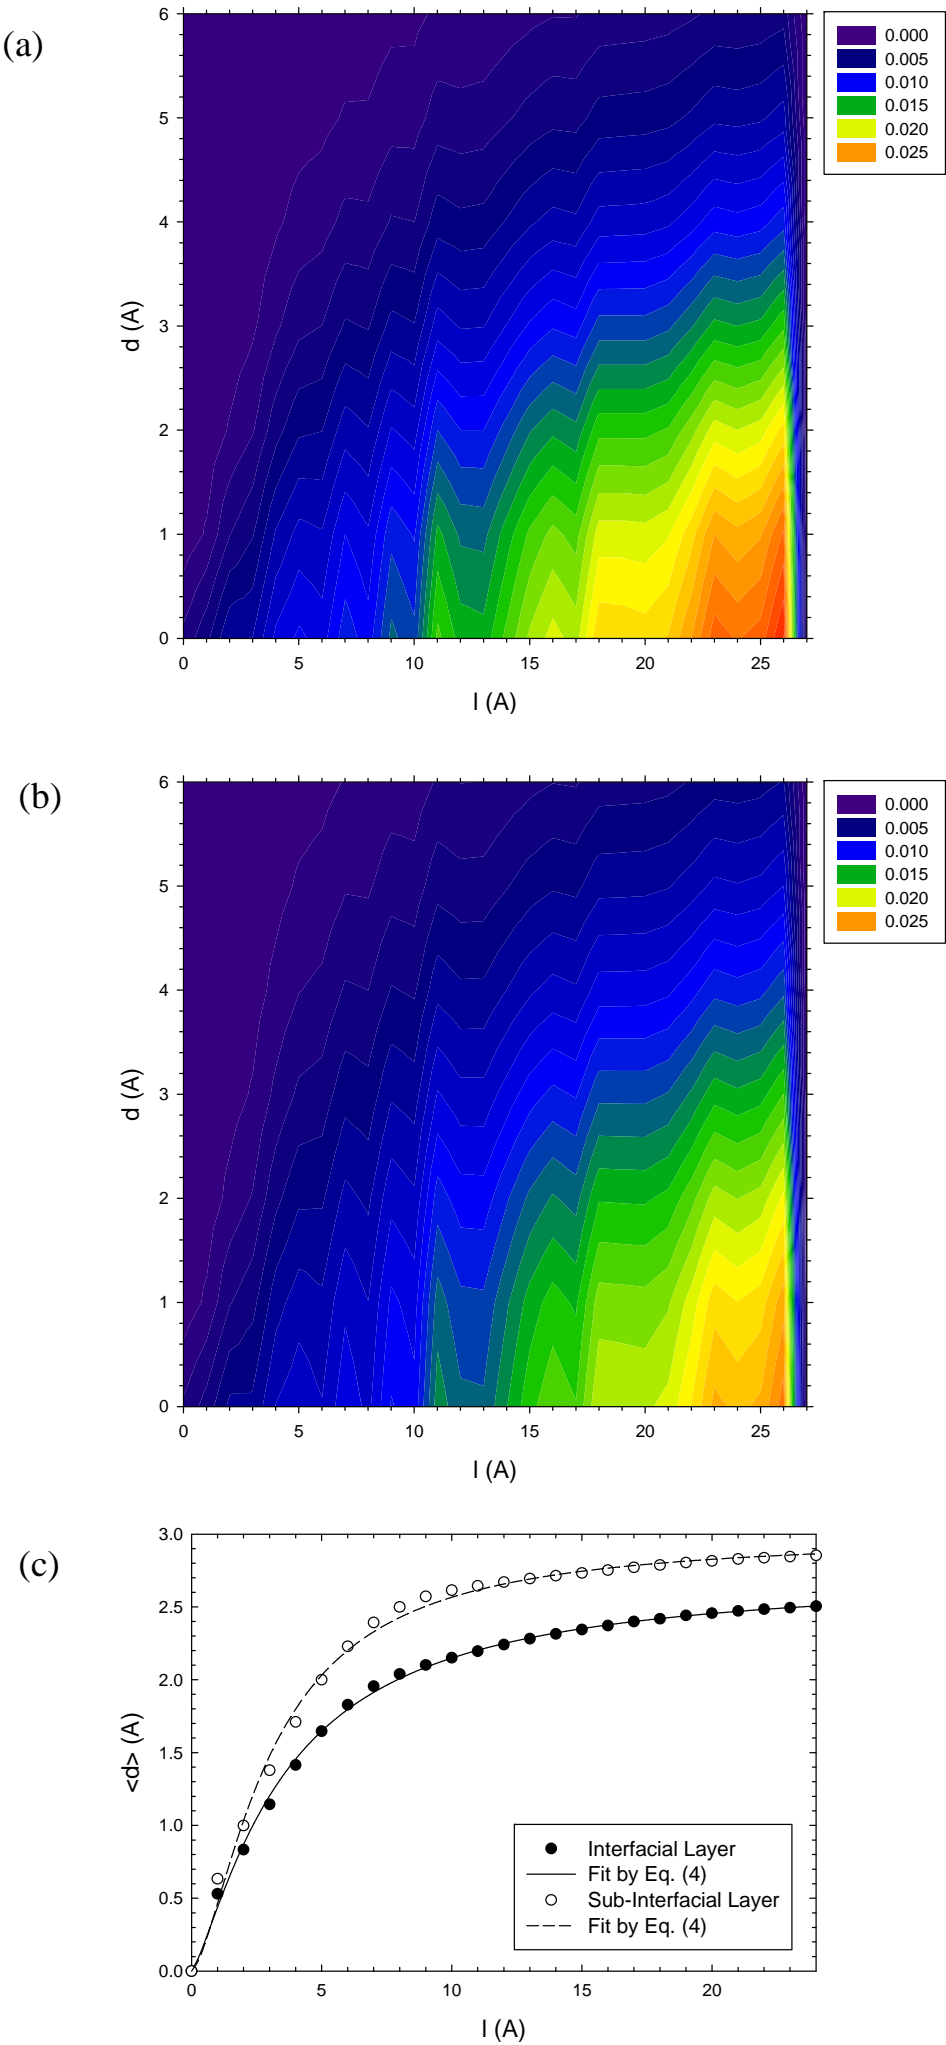

Fig. S2 (Lisal et al.)

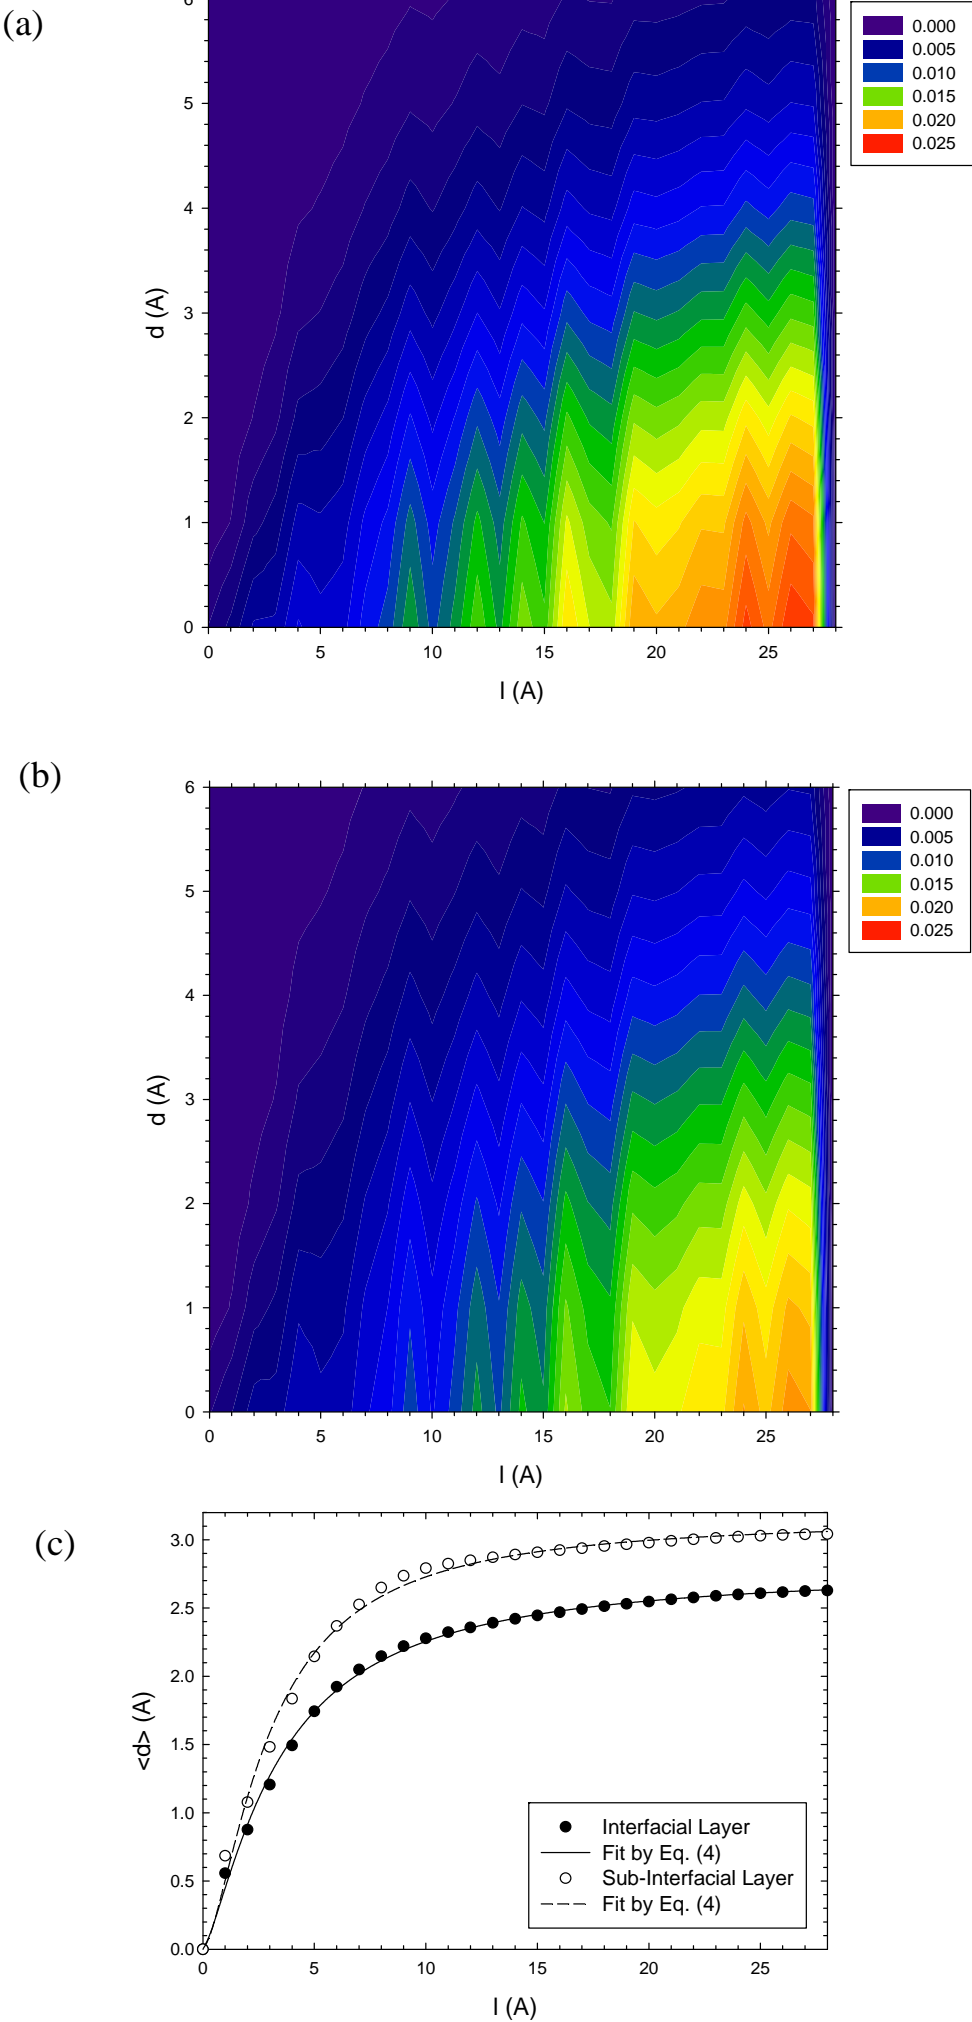

Fig. S3 (Lisal et al.)

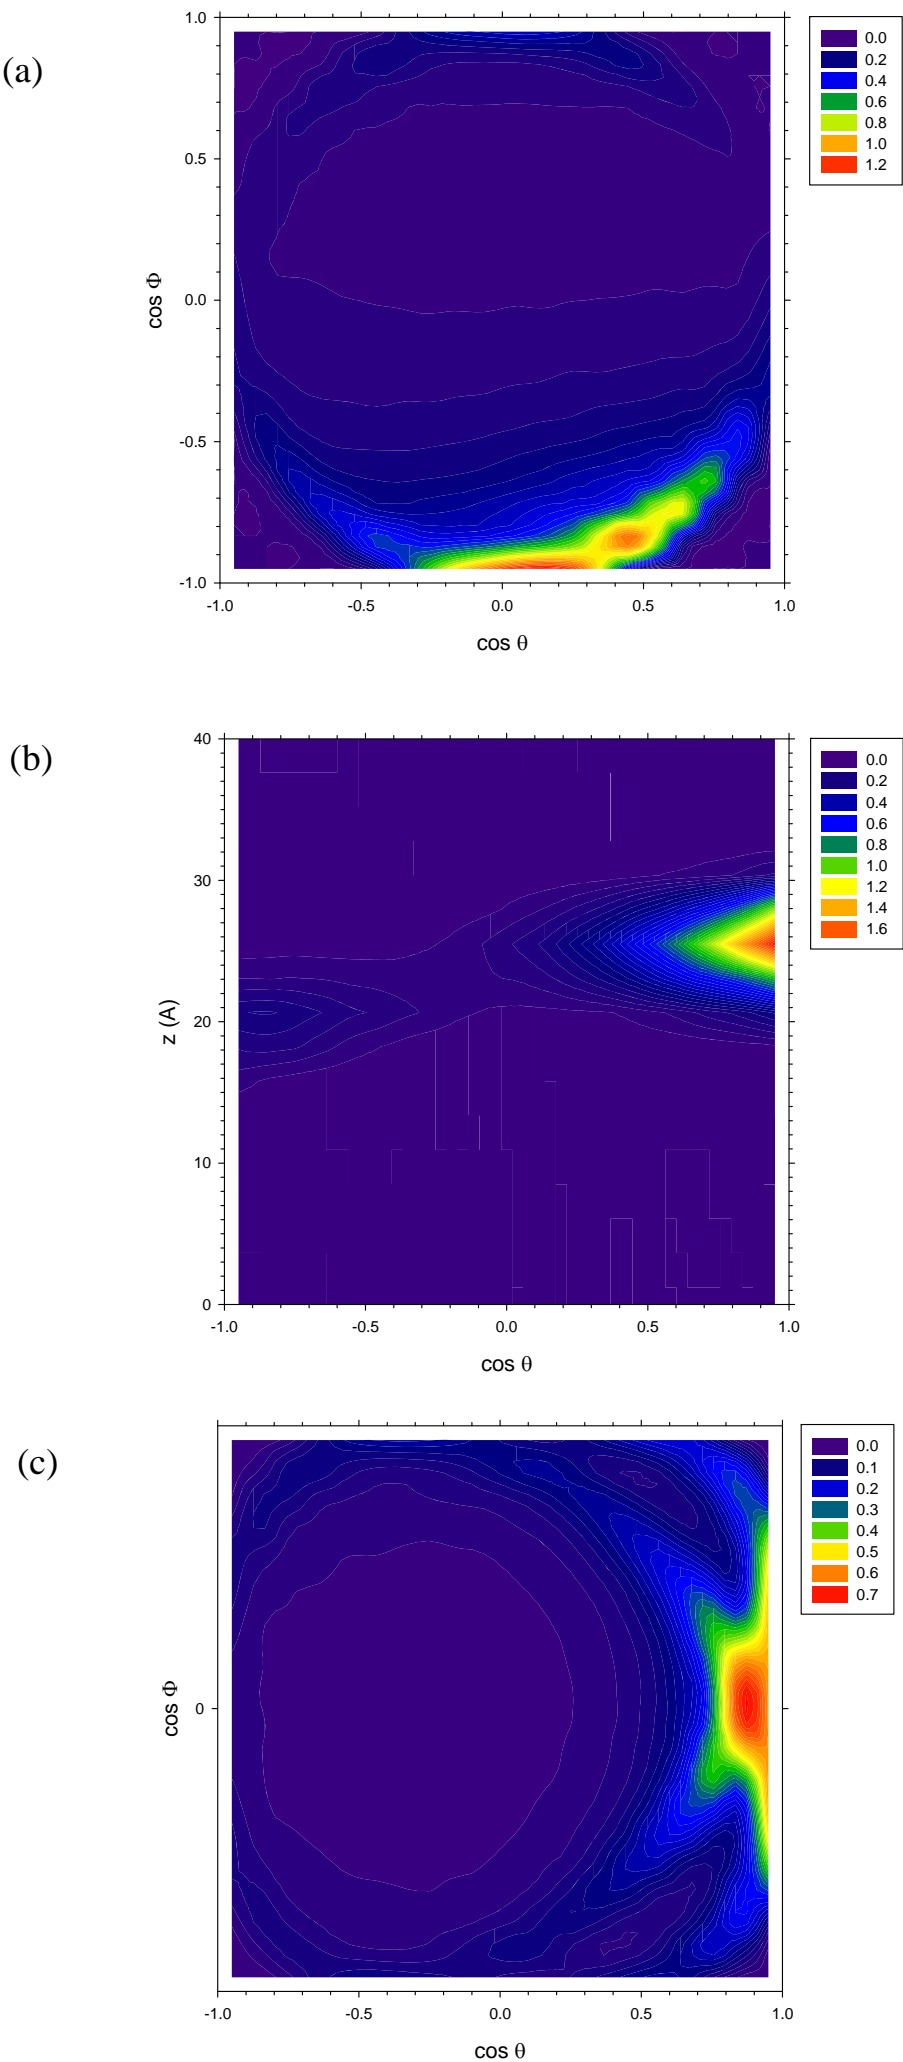

Fig. S4 (Lisal et al.)

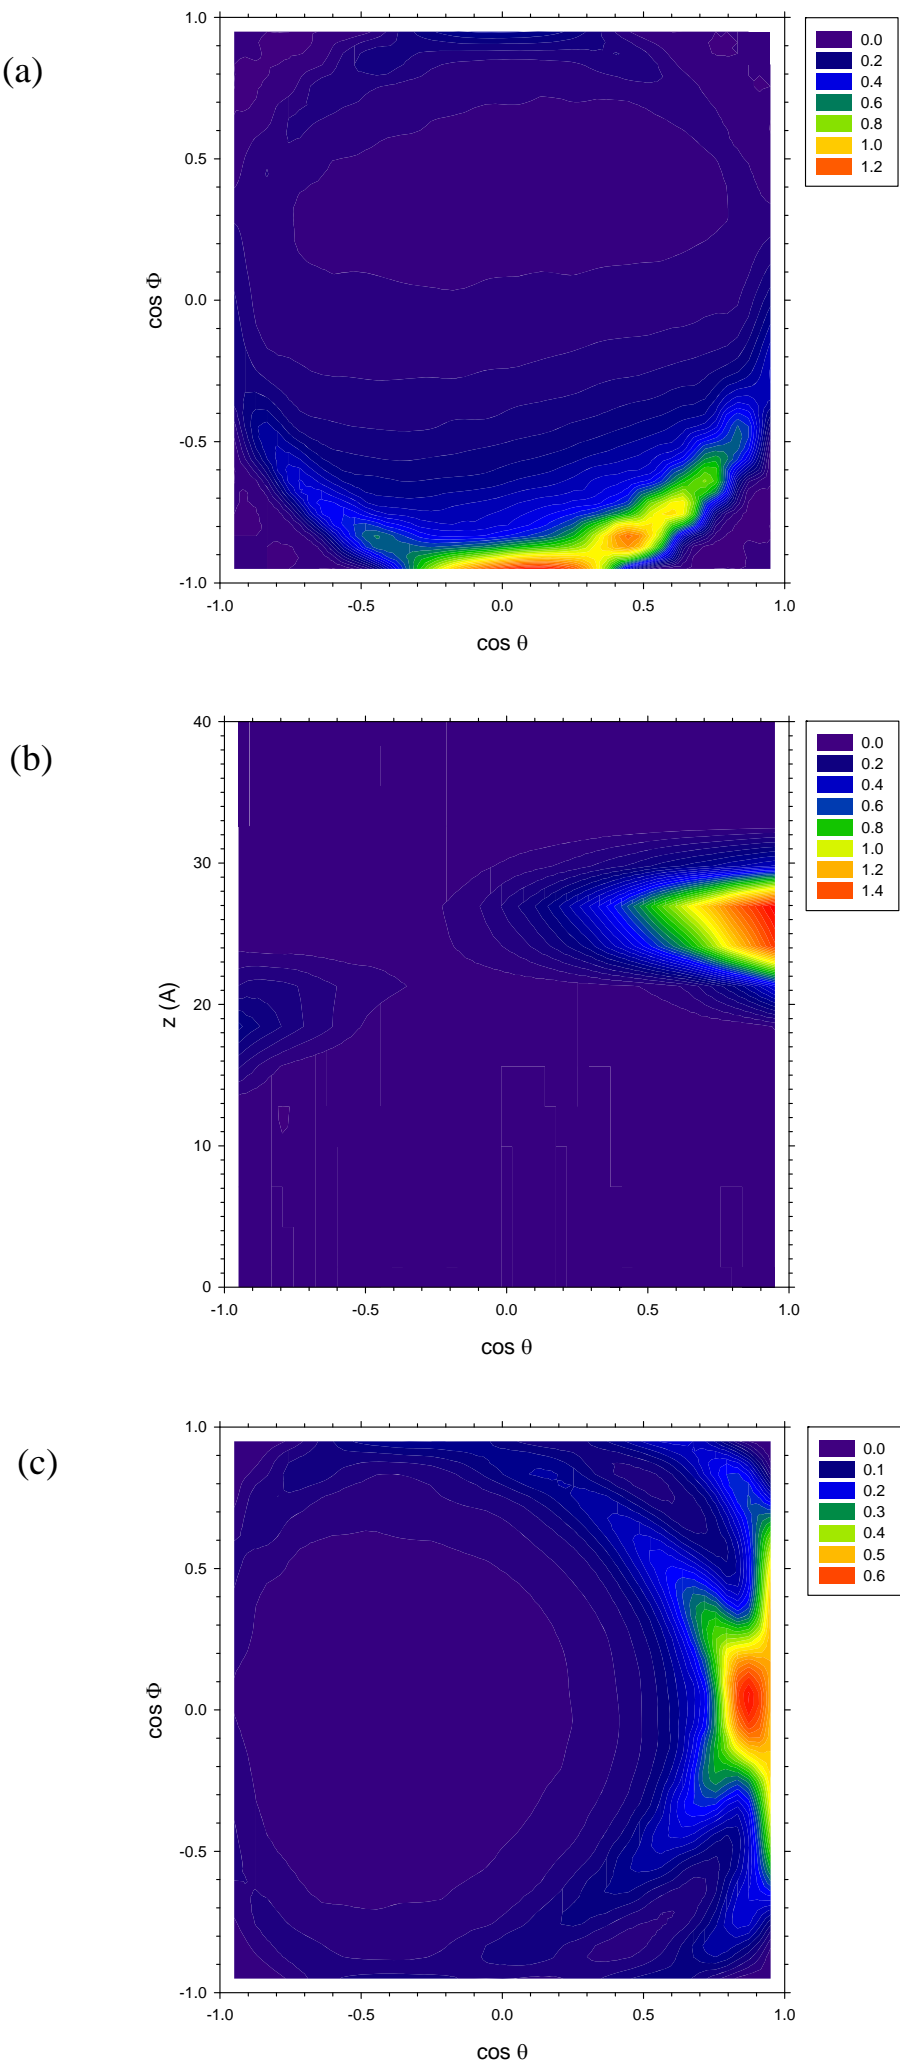

Supplement: c2cp23572b.pdf [file c2cp23572b.pdf]
